# Supplementary material for: Optical properties of biosilicas in rice plants
Source: Royal Society of Chemistry journal article supplement (doi:10.1039/c6ra24449a), 2016-01-01
Supplement: c6ra24449a1.pdf [file c6ra24449a1.pdf]

## Optical Properties of Biosilicas in Rice Plants

Kanako Sato,<sup>a</sup> Akira Yamauchi,<sup>a</sup> Noriaki Ozaki,<sup>b</sup> Takaaki Ishigure,<sup>a</sup> Yuya Oaki<sup>a</sup> and Hiroaki Imai<sup>a\*</sup>

### SUPPORTING INFORMATION

#### Supplementary Figures

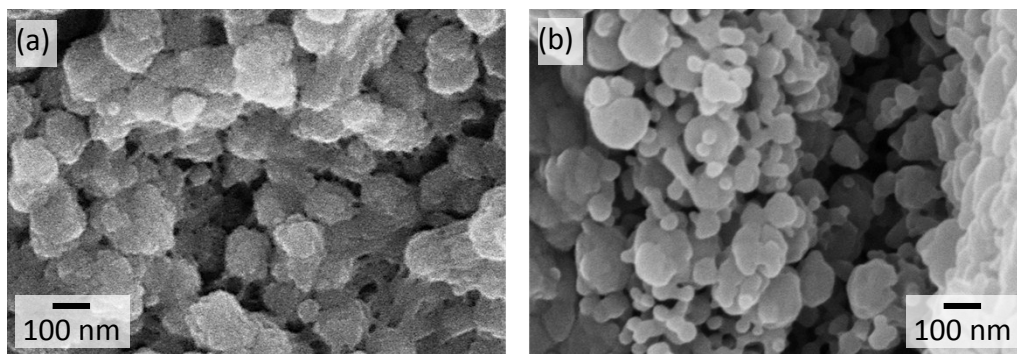

**Figure S1.** FESEM images of the silica particles composing the silica plates. (a) untreated sample.

(b) sample after calcination at 500 °C for 3 h.

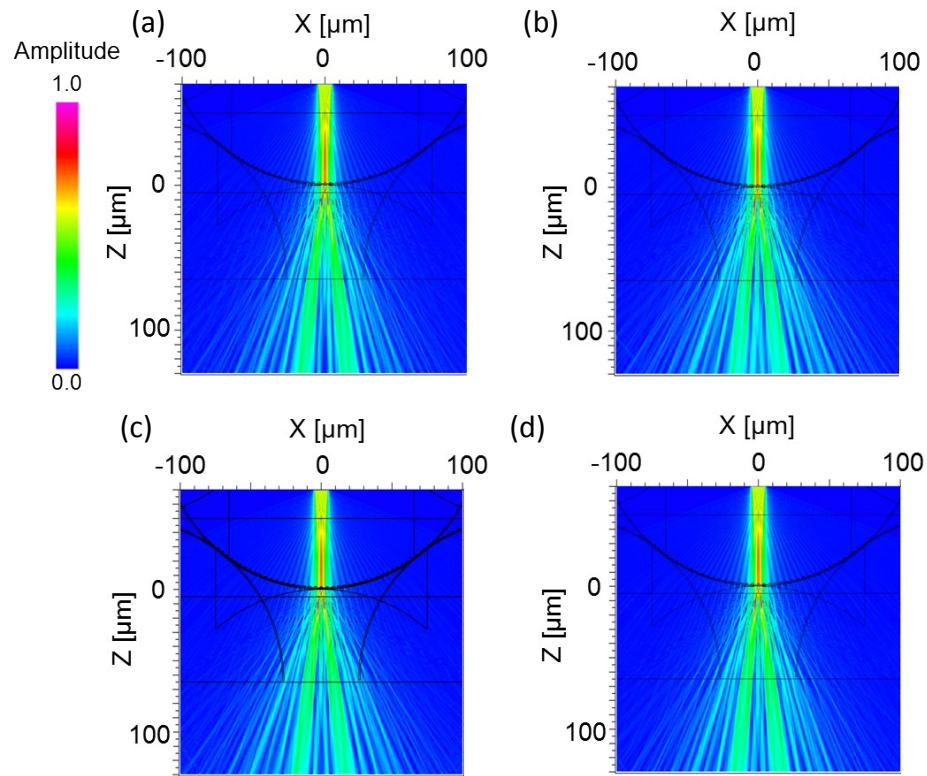

**Figure S2.** Amplitude maps of light entering the silica plates. Refractive indices of biosilicas ( $n_b$ ) and the matrix ( $n_m$ ) are: (a)  $(n_b, n_m) = (1.42, 1.40)$ , (b)  $(n_b, n_m) = (1.50, 1.40)$ , (c)  $(n_b, n_m) = (1.46, 1.33)$ , (d)  $(n_b, n_m) = (1.46, 1.46)$ .
